# Supplementary material for: The Accuracy of p16/Ki-67 and HPV Test in the Detection of CIN2/3 in Women Diagnosed with ASC-US or LSIL
Source: PLoS One. 2015 Jul 31;10(7):e0134445. doi: 10.1371/journal.pone.0134445 (PMC4521700; doi:10.1371/journal.pone.0134445)
Supplement: S1 File — (XLSX) [file pone.0134445.s001.xlsx]

## Sheet: Plan1
ID	AGE (years)	MARITAL ESTATUS	PREGNANCY_N	VAGINAL DELIVERY	SURGERY DELIVERY	ABORTION	MENOPAUSE	SEXUAL INTIATION_AGE	MENARCHE_AGE	NUMBER SEXUAL PARTINERS	PAP SMEARS	HISTOLOGY	HPV_16	HPV_18	ANOTHER HPV	P16	KI67	P16 AND KI67
1	28	married	0	0	0	0	No	25	14	1	ASC-US	benign	Negative	Negative	Negative	negative	negative	negative
2	29	married	2	2	0	0	No	15	14	1	ASC-US	benign	Negative	Negative	Negative	negative	negative	negative
3	24	Solteira	0	0	0	0	No	18	11	1	ASC-US	benign	Negative	Negative	Negative	negative	negative	negative
4	18	single woman	0	0	0	0	No	16	11	1	ASC-US	benign	Negative	Negative	Negative	negative	negative	negative
5	26	married	2	1	1	0	No	15	10	5	ASC-US	benign	Negative	Positive	Positive	negative	negative	negative
6	20	married	1	0	1	0	No	17	14	3	ASC-US	benign	Negative	Negative	Negative	positive	negative	negative
7	23	married	0	0	0	0	No	16	11	1	ASC-US	benign	Negative	Negative	Negative	positive	negative	negative
8	25	single woman	0	0	0	0	No	15	9	5	ASC-US	benign	Negative	Negative	Negative	negative	negative	negative
9	24	married	2	1	1	0	No	13	12	3	ASC-US	benign	Negative	Negative	Negative	positive	positive	positive
10	30	married	2	1	1	0	No	15	11	8	ASC-US	benign	Negative	Negative	Negative	negative	negative	negative
11	25	married	3	0	3	0	No	15	14	2	ASC-US	CIN1	Positive	Negative	Positive	positive	positive	positive
12	27	married	3	3	0	0	No	14	12	3	ASC-US	CIN1	Negative	Negative	Negative	negative	negative	negative
13	25	single woman	0	0	0	0	No	17	11	4	ASC-US	CIN1	Positive	Negative	Positive	negative	negative	negative
14	21	single woman	0	0	0	0	No	14	13	10	ASC-US	CIN1	Negative	Negative	Positive	negative	negative	negative
15	26	married	2	1	1	0	No	17	11	1	ASC-US	CIN1	Negative	Negative	Positive	negative	negative	negative
16	20	single woman	2	0	1	1	No	14	12	2	ASC-US	CIN1	Negative	Negative	Negative	negative	negative	negative
17	26	single woman	0	0	0	0	No	16	11	4	ASC-US	CIN1	Positive	Negative	Negative	positive	positive	positive
18	19	single woman	0	0	0	0	No	16	16	3	ASC-US	CIN2/CIN3	Positive	Negative	Negative	positive	positive	positive
19	24	single woman	0	0	0	0	No	15	13	3	ASC-US	CIN2/CIN3	Negative	Negative	Negative	negative	negative	negative
20	29	married	1	0	1	0	No	14	12	1	ASC-US	benign	Negative	Negative	Positive	negative	negative	negative
21	30	married	2	1	1	0	No	15	13	4	ASC-US	benign	Negative	Negative	Negative	negative	negative	negative
22	26	married	1	0	1	0	No	18	11	2	ASC-US	benign	Negative	Negative	Negative	negative	negative	negative
23	23	married	1	0	1	0	No	15	13	6	ASC-US	benign	Negative	Negative	Negative	negative	negative	negative
24	76	widow	8	8	0	0	Yes	19	17	1	ASC-US	benign	Negative	Negative	Negative	negative	negative	negative
25	55	married	2	0	2	0	Yes	19	11	2	ASC-US	benign	Negative	Negative	Negative	negative	negative	negative
26	46	single woman	3	2	1	0	Yes	16	13	10	ASC-US	benign	Negative	Negative	Negative	negative	negative	negative
27	61	married	0	0	0	0	Yes	46	16	1	ASC-US	benign	Negative	Negative	Negative	negative	negative	negative
28	42	married	2	0	1	1	No	16	14	3	ASC-US	benign	Negative	Negative	Negative	negative	negative	negative
29	33	married	5	4	1	0	No	13	11	1	ASC-US	benign	Negative	Negative	Negative	negative	negative	negative
30	38	single woman	4	0	4	0	No	15	10	10	ASC-US	benign	Negative	Negative	Negative	negative	negative	negative
31	58	married	3	2	1	0	Yes	22	16	8	ASC-US	benign	Negative	Negative	Positive	negative	negative	negative
32	56	divorced	0	0	0	0	Yes	22	12	5	ASC-US	benign	Negative	Positive	Positive	negative	negative	negative
33	62	married	3	0	3	0	Yes	22	14	5	ASC-US	benign	Negative	Negative	Negative	negative	negative	negative
34	61	married	1	0	1	0	unknown	25	16	1	ASC-US	benign	Negative	Negative	Negative	positive	positive	positive
35	39	married	3	3	0	0	No	17	13	>10	ASC-US	benign	Negative	Negative	Negative	negative	negative	negative
36	63	widow	4	3	0	1	Yes	20	14	1	ASC-US	benign	Negative	Negative	Negative	positive	negative	negative
37	43	married	4	3	0	1	No	18	12	1	ASC-US	benign	Negative	Negative	Negative	negative	negative	negative
38	65	married	2	2	0	0	Yes	26	11	1	ASC-US	benign	Negative	Negative	Negative	positive	negative	negative
39	43	married	2	0	2	0	No	18	13	1	ASC-US	benign	Positive	Negative	Negative	negative	negative	negative
40	40	married	1	0	1	0	No	22	12	1	ASC-US	benign	Negative	Negative	Negative	positive	negative	negative
41	36	married	1	1	0	0	No	18	14	1	ASC-US	benign	Negative	Negative	Negative	negative	negative	negative
42	35	married	1	1	0	0	No	22	13	1	ASC-US	benign	Negative	Negative	Negative	negative	negative	negative
43	52	widow	3	2	1	0	Yes	19	13	1	ASC-US	benign	Negative	Negative	Negative	negative	negative	negative
44	61	widow	4	4	0	0	Yes	18	11	2	ASC-US	CIN1	Negative	Negative	Positive	negative	negative	negative
45	48	married	7	7	0	0	No	14	12	3	ASC-US	CIN1	Negative	Negative	Negative	negative	negative	negative
46	39	widow	1	0	1	0	No	20	11	10	ASC-US	CIN1	inconclusive	Inconclusive	inconclusive	negative	negative	negative
47	46	married	2	0	2	0	No	21	12	1	ASC-US	CIN1	Negative	Negative	Negative	negative	negative	negative
48	39	married	3	0	3	0	No	20	13	2	ASC-US	CIN1	Negative	Negative	Negative	negative	negative	negative
49	42	single woman	2	1	0	1	No	19	11	2	ASC-US	CIN1	Negative	Negative	Negative	positive	negative	negative
50	31	married	2	2	0	0	No	17	15	5	ASC-US	CIN1	Negative	Negative	Positive	negative	negative	negative
51	65	married	3	3	0	0	Yes	16	12	1	ASC-US	CIN1	Negative	Negative	Negative	negative	negative	negative
52	48	married	4	0	4	0	unknown	15	14	1	ASC-US	CIN1	inconclusive	Inconclusive	inconclusive	negative	negative	negative
53	45	single woman	2	0	1	1	No	16	12	5	ASC-US	CIN1	Negative	Negative	Negative	negative	negative	negative
54	44	single woman	1	0	1	0	No	18	12	6	ASC-US	CIN1	Negative	Negative	Negative	negative	negative	negative
55	56	single woman	3	3	0	0	Yes	17	16	4	ASC-US	CIN1	Negative	Negative	Negative	negative	negative	negative
56	31	married	2	1	1	0	No	14	12	2	ASC-US	CIN1	Negative	Negative	Positive	positive	positive	positive
57	61	married	4	3	1	0	Yes	12	12	2	ASC-US	CIN1	Negative	Negative	Negative	negative	negative	negative
58	47	single woman	2	0	1	0	No	24	12	1	ASC-US	CIN1	Negative	Negative	Negative	positive	positive	negative
59	32	married	1	0	1	0	No	16	15	4	ASC-US	CIN1	Negative	Negative	Positive	negative	negative	negative
60	48	single woman	2	1	1	0	Yes	18	13	1	ASC-US	CIN1	Negative	Negative	Negative	negative	negative	negative
61	53	single woman	3	0	2	1	Yes	19	13	3	ASC-US	CIN1	Negative	Negative	Positive	negative	negative	negative
62	42	married	3	0	3	0	No	13	11	4	ASC-US	CIN1	Negative	Negative	Negative	negative	negative	negative
63	51	married	3	3	0	0	No	18	13	1	ASC-US	CIN1	Negative	Negative	Negative	negative	negative	negative
64	42	single woman	0	0	0	0	No	18	13	7	ASC-US	CIN2/CIN3	Negative	Negative	Positive	positive	positive	positive
65	31	married	3	3	0	0	No	15	12	1	ASC-US	CIN2/CIN3	Negative	Negative	Positive	positive	positive	positive
66	43	married	2	2	0	0	No	17	14	1	ASC-US	CIN2/CIN3	Negative	Negative	Positive	negative	negative	negative
67	68	widow	4	3	1	0	Yes	19	16	2	ASC-US	CIN2/CIN3	Positive	Negative	Negative	positive	positive	positive
68	32	married	4	1	1	2	No	14	11	>10	ASC-US	CIN2/CIN3	Negative	Negative	Positive	positive	positive	positive
69	34	single woman	0	0	0	0	No	18	14	6	ASC-US	CIN2/CIN3	Positive	Negative	Positive	negative	negative	negative
70	39	divorced	2	0	1	1	No	20	12	2	ASC-US	Inconclusive	inconclusive	Inconclusive	Positive	negative	negative	negative
71	61	married	4	4	0	0	Yes	22	13	1	ASC-US	benign	Negative	Negative	Negative	positive	negative	negative
72	55	single woman	5	5	0	0	Yes	12	14	3	ASC-US	benign	Negative	Negative	Negative	negative	negative	negative
73	66	divorced	7	4	0	3	Yes	18	12	1	ASC-US	benign	Negative	Negative	Negative	positive	negative	negative
74	48	divorced	3	1	2	0	Yes	18	11	1	ASC-US	benign	Negative	Negative	Negative	negative	negative	negative
75	38	married	3	3	0	0	No	12	8	3	ASC-US	benign	Negative	Negative	Positive	positive	positive	positive
76	59	married	5	5	0	0	Yes	17	11	1	ASC-US	benign	Negative	Negative	Negative	positive	positive	negative
77	41	married	2	0	2	0	No	17	12	2	ASC-US	benign	Negative	Negative	Negative	negative	negative	negative
78	43	married	2	2	0	0	No	17	11	2	ASC-US	benign	Negative	Negative	Positive	positive	positive	negative
79	45	single woman	2	2	0	0	unknown	15	10	1	ASC-US	benign	Negative	Negative	Negative	negative	negative	negative
80	57	single woman	3	3	0	0	Yes	17	14	6	ASC-US	benign	Negative	Negative	Negative	negative	negative	negative
81	35	married	1	0	1	0	No	25	13	1	ASC-US	benign	Negative	Negative	Negative	negative	negative	negative
82	65	married	2	2	0	0	Yes	18	11	1	ASC-US	benign	Negative	Negative	Negative	negative	negative	negative
83	41	married	1	0	1	0	No	20	12	8	ASC-US	benign	Negative	Negative	Negative	negative	negative	negative
84	54	married	0	0	0	0	No	29	12	3	ASC-US	benign	Negative	Negative	Negative	negative	negative	negative
85	47	single woman	1	0	1	0	No	13	12	4	ASC-US	benign	inconclusive	Inconclusive	inconclusive	negative	negative	negative
86	45	widow	3	0	2	1	No	26	11	1	ASC-US	benign	Negative	Negative	Negative	negative	negative	negative
87	53	married	3	2	1	0	Yes	18	14	1	ASC-US	benign	Negative	Negative	Negative	positive	negative	negative
88	32	married	1	1	0	0	No	15	13	8	ASC-US	benign	Negative	Negative	Negative	positive	negative	negative
89	45	married	0	0	0	0	No	30	17	1	ASC-US	benign	Negative	Negative	Negative	negative	negative	negative
90	52	married	4	4	0	0	Yes	21	13	1	ASC-US	benign	Negative	Negative	Negative	positive	negative	negative
91	72	widow	8	6	0	2	Yes	22	18	1	ASC-US	benign	Negative	Negative	Negative	positive	negative	negative
92	54	married	2	2	0	0	Yes	19	11	1	ASC-US	benign	Negative	Negative	Negative	negative	negative	negative
93	44	single woman	4	3	0	1	No	15	13	2	ASC-US	benign	Negative	Negative	Negative	positive	negative	negative
94	40	married	2	2	0	0	No	21	11	3	ASC-US	benign	Negative	Negative	Negative	negative	negative	negative
95	41	married	2	0	2	0	No	15	14	3	ASC-US	benign	inconclusive	Inconclusive	inconclusive	positive	negative	negative
96	36	married	2	2	0	0	No	16	13	2	ASC-US	benign	Negative	Negative	Negative	negative	negative	negative
97	22	married	2	0	0	2	No	15	13	2	LSIL	benign	Negative	Negative	Positive	positive	positive	positive
98	18	married	0	0	0	0	No	15	14	6	LSIL	benign	Negative	Negative	Positive	negative	positive	negative
99	26	single woman	0	0	0	0	No	19	13	5	LSIL	benign	Negative	Negative	Positive	negative	positive	negative
100	18	single woman	0	0	0	0	No	15	13	2	LSIL	benign	Negative	Positive	Negative	negative	negative	negative
101	22	married	1	0	1	0	No	16	13	>10	LSIL	benign	Negative	Negative	Positive	positive	negative	negative
102	19	single woman	0	0	0	0	No	18	12	1	LSIL	CIN1	Negative	Negative	Positive	negative	positive	negative
103	26	married	2	1	0	1	No	16	15	8	LSIL	CIN1	Negative	Negative	Positive	positive	positive	positive
104	23	single woman	2	2	0	0	No	15	13	2	LSIL	CIN1	Positive	Negative	Negative	positive	positive	positive
105	21	single woman	2	0	2	0	No	16	16	7	LSIL	CIN1	Negative	Negative	Positive	negative	negative	negative
106	20	single woman	0	0	0	0	No	12	9	>10	LSIL	CIN1	Positive	Negative	Negative	positive	positive	positive
107	27	single woman	2	0	2	0	No	18	15	2	LSIL	CIN1	Negative	Negative	Positive	negative	negative	negative
108	22	single woman	0	0	0	0	No	21	15	2	LSIL	CIN1	inconclusive	Inconclusive	Positive	positive	negative	negative
109	27	single woman	0	0	0	0	No	18	14	3	LSIL	CIN1	Negative	Negative	Positive	positive	positive	positive
110	19	single woman	0	0	0	0	No	15	12	2	LSIL	CIN1	Negative	Negative	Positive	negative	negative	negative
111	23	single woman	0	0	0	0	No	20	15	1	LSIL	CIN1	inconclusive	Inconclusive	inconclusive	negative	negative	negative
112	24	single woman	2	0	2	0	No	16	10	4	LSIL	CIN1	Negative	Negative	Positive	positive	positive	positive
113	19	single woman	0	0	0	0	No	16	14	3	LSIL	CIN1	Positive	Negative	Positive	negative	negative	negative
114	20	single woman	0	0	0	0	No	17	10	2	LSIL	CIN1	Negative	Negative	Positive	negative	negative	negative
115	27	single woman	0	0	0	0	No	19	15	4	LSIL	CIN1	Negative	Negative	Positive	positive	positive	positive
116	28	single woman	3	3	0	0	No	14	12	4	LSIL	CIN1	Negative	Positive	Positive	positive	positive	positive
117	30	single woman	0	0	0	0	No	18	14	2	LSIL	CIN1	Negative	Negative	Positive	positive	positive	negative
118	21	single woman	1	1	0	0	No	15	11	5	LSIL	CIN1	Negative	Negative	Positive	negative	negative	negative
119	26	single woman	0	0	0	0	No	20	12	2	LSIL	CIN1	Negative	Negative	Negative	negative	negative	negative
120	25	single woman	0	0	0	0	No	18	14	1	LSIL	CIN1	Negative	Negative	Positive	positive	negative	negative
121	25	single woman	1	0	1	0	No	19	13	2	LSIL	CIN1	Negative	Negative	Positive	positive	positive	positive
122	24	single woman	0	0	0	0	No	22	11	2	LSIL	CIN1	Negative	Positive	Positive	positive	negative	negative
123	23	married	0	0	0	0	No	15	11	1	LSIL	CIN1	Positive	Negative	Negative	negative	negative	negative
124	19	single woman	0	0	0	0	No	15	14	5	LSIL	CIN1	Positive	Negative	Negative	positive	positive	positive
125	23	married	1	0	1	0	No	18	13	1	LSIL	CIN1	Negative	Negative	Negative	negative	negative	negative
126	24	married	2	2	0	0	No	16	12	1	LSIL	CIN2/CIN3	Negative	Negative	Negative	positive	positive	positive
127	30	married	2	0	2	0	No	17	13	1	LSIL	CIN2/CIN3	Positive	Negative	Negative	positive	positive	positive
128	30	single woman	1	0	1	0	No	14	14	5	LSIL	CIN2/CIN3	Negative	Negative	Positive	negative	negative	negative
129	20	married	0	0	0	0	No	16	12	4	LSIL	CIN2/CIN3	Negative	Positive	Positive	positive	positive	positive
130	27	single woman	1	0	1	0	No	14	15	5	LSIL	CIN2/CIN3	Negative	Positive	Negative	positive	positive	positive
131	27	married	1	0	1	0	No	15	11	4	LSIL	CIN2/CIN3	Positive	Negative	Negative	positive	positive	positive
132	27	married	3	0	1	2	No	15	14	>10	LSIL	CIN2/CIN3	Positive	Negative	Negative	positive	positive	positive
133	22	married	2	0	2	0	No	18	14	99	LSIL	CIN2/CIN3	Negative	Negative	Positive	negative	negative	negative
134	24	single woman	2	2	0	0	No	15	12	6	LSIL	CIN2/CIN3	Positive	Negative	Negative	positive	positive	positive
135	27	married	2	2	0	0	No	16	14	3	LSIL	CIN2/CIN3	Negative	Negative	Positive	positive	positive	positive
136	26	married	1	1	0	0	No	20	12	2	LSIL	CIN2/CIN3	Negative	Positive	Negative	positive	positive	positive
137	25	married	0	0	0	0	No	16	11	99	LSIL	CIN2/CIN3	Negative	Negative	Negative	positive	positive	positive
138	24	married	1	0	1	0	No	17	11	2	LSIL	CIN2/CIN3	Positive	Negative	Negative	positive	positive	positive
139	24	single woman	0	0	0	0	No	21	14	1	LSIL	CIN2/CIN3	Positive	Negative	Negative	positive	positive	positive
140	19	married	1	0	1	0	No	15	11	>10	LSIL	Inconclusive	Negative	Negative	Negative	positive	positive	positive
141	26	married	3	2	1	0	No	12	8	>10	LSIL	benign	inconclusive	Inconclusive	Positive	negative	negative	negative
142	36	divorced	2	0	2	0	No	15	11	7	LSIL	benign	inconclusive	Inconclusive	Positive	positive	negative	negative
143	33	married	2	2	0	0	No	15	11	5	LSIL	benign	Negative	Negative	Negative	negative	negative	negative
144	47	single woman	0	0	0	0	No	24	11	4	LSIL	benign	Negative	Negative	Negative	negative	negative	negative
145	41	single woman	1	1	0	0	No	21	13	2	LSIL	benign	Positive	Negative	Negative	negative	negative	negative
146	53	single woman	2	2	0	0	Yes	22	12	3	LSIL	benign	Negative	Negative	Positive	negative	negative	negative
147	36	married	1	0	1	0	No	15	12	3	LSIL	benign	Negative	Negative	Negative	negative	negative	negative
148	57	single woman	9	5	4	0	Yes	17	17	2	LSIL	benign	Negative	Negative	Positive	negative	negative	negative
149	50	widow	11	6	0	5	Yes	16	15	4	LSIL	benign	Negative	Negative	Negative	negative	negative	negative
150	33	married	0	0	0	0	No	16	12	6	LSIL	benign	Negative	Negative	Positive	negative	negative	negative
151	45	married	2	1	1	0	No	20	12	5	LSIL	benign	Negative	Negative	Negative	negative	negative	negative
152	43	divorced	3	3	0	0	No	14	11	5	LSIL	benign	inconclusive	Inconclusive	inconclusive	positive	positive	positive
153	58	married	2	0	2	0	Yes	23	12	1	LSIL	benign	Positive	Positive	Negative	positive	positive	positive
154	35	single woman	0	0	0	0	No	28	11	6	LSIL	CIN1	Negative	Negative	Negative	positive	positive	positive
155	49	married	2	0	2	0	Yes	16	11	1	LSIL	CIN1	Negative	Positive	Positive	negative	negative	negative
156	41	married	3	0	1	2	unknown	18	14	2	LSIL	CIN2/CIN3	Negative	Negative	Positive	negative	negative	negative
157	36	single woman	0	0	0	0	No	25	15	2	LSIL	CIN2/CIN3	Negative	Negative	Positive	negative	positive	negative
158	56	divorced	3	2	1	0	Yes	19	11	1	LSIL	CIN1	Negative	Negative	Negative	negative	negative	negative
159	41	married	2	0	2	0	No	25	13	2	LSIL	CIN1	Negative	Negative	Negative	negative	negative	negative
160	41	married	2	0	2	0	No	17	12	1	LSIL	CIN1	Negative	Negative	Negative	negative	negative	negative
161	39	married	5	5	0	0	No	16	14	3	LSIL	CIN1	Positive	Negative	Negative	positive	positive	positive
162	46	divorced	3	2	0	1	No	17	15	2	LSIL	CIN1	Negative	Negative	Positive	positive	negative	negative
163	37	divorced	2	0	2	0	No	17	14	2	LSIL	CIN1	Positive	Negative	Positive	negative	negative	negative
164	75	single woman	1	0	1	0	Yes	31	12	8	LSIL	CIN1	Negative	Negative	Negative	negative	negative	negative
165	33	single woman	4	0	4	0	No	13	10	4	LSIL	CIN1	Negative	Negative	Positive	positive	negative	negative
166	55	single woman	6	3	0	3	Yes	16	14	1	LSIL	CIN1	Negative	Negative	Positive	positive	positive	positive
167	32	married	3	3	0	0	No	16	15	3	LSIL	CIN1	Negative	Negative	Negative	negative	negative	negative
168	43	single woman	1	1	0	0	No	20	12	3	LSIL	CIN1	Negative	Negative	Negative	positive	positive	positive
169	49	divorced	3	2	0	1	Yes	16	12	5	LSIL	CIN1	Negative	Negative	Positive	negative	positive	negative
170	40	married	8	6	0	2	No	15	13	3	LSIL	CIN1	Negative	Negative	Positive	positive	positive	positive
171	46	married	7	7	0	0	No	15	13	1	LSIL	CIN1	inconclusive	Inconclusive	inconclusive	negative	negative	negative
172	42	single woman	2	2	0	0	No	17	13	4	LSIL	CIN1	Negative	Negative	Positive	negative	negative	negative
173	44	divorced	1	0	1	0	No	18	12	4	LSIL	CIN1	Negative	Negative	Negative	negative	negative	negative
174	56	widow	2	2	0	0	Yes	16	14	2	LSIL	CIN1	Negative	Negative	Positive	negative	negative	negative
175	40	married	5	5	0	0	No	13	13	2	LSIL	CIN1	Negative	Negative	Negative	negative	negative	negative
176	34	single woman	3	3	0	0	No	14	13	10	LSIL	CIN2/CIN3	Negative	Negative	Positive	negative	negative	negative
177	34	married	7	5	2	0	No	14	13	3	LSIL	CIN2/CIN3	Negative	Negative	Positive	positive	positive	positive
178	40	married	2	2	0	0	No	16	13	2	LSIL	CIN2/CIN3	Negative	Negative	Negative	negative	negative	negative
179	31	single woman	0	0	0	0	No	18	12	4	LSIL	CIN2/CIN3	Negative	Negative	Positive	positive	negative	negative
180	45	single woman	2	2	0	0	No	17	17	2	LSIL	CIN2/CIN3	Negative	Negative	Positive	positive	positive	positive
181	43	married	3	3	0	0	No	12	11	1	LSIL	CIN2/CIN3	Negative	Negative	Positive	positive	positive	positive
182	68	single woman	5	4	0	1	Yes	19	11	10	LSIL	CIN2/CIN3	Positive	Positive	Positive	positive	positive	positive
183	52	widow	3	0	3	0	Yes	15	13	3	LSIL	benign	Negative	Negative	Negative	negative	negative	negative
184	52	married	4	4	0	0	Yes	26	12	1	LSIL	benign	Negative	Negative	Negative	negative	negative	negative
185	31	divorced	4	0	2	2	No	22	13	1	LSIL	benign	Negative	Negative	Positive	negative	negative	negative
186	48	single woman	0	0	0	0	No	44	11	1	LSIL	benign	Negative	Negative	Positive	negative	negative	negative
187	53	single woman	5	4	1	0	unknown	18	15	2	LSIL	benign	Negative	Negative	Negative	negative	negative	negative
188	50	married	3	1	2	0	Yes	17	14	1	LSIL	benign	inconclusive	Inconclusive	inconclusive	negative	negative	negative
189	57	divorced	7	4	1	2	Yes	17	14	1	LSIL	benign	Negative	Negative	Negative	positive	negative	negative
190	34	divorced	2	0	2	0	No	17	10	3	LSIL	benign	Negative	Negative	Negative	positive	negative	negative
191	51	divorced	9	0	3	6	No	16	15	2	LSIL	benign	Positive	Negative	Negative	positive	positive	positive
192	44	married	2	0	2	0	No	15	11	>10	LSIL	benign	Negative	Negative	Negative	negative	negative	negative
193	48	married	4	0	3	1	Yes	18	12	1	LSIL	benign	Negative	Negative	Negative	negative	negative	negative
194	56	married	4	4	0	0	Yes	17	15	3	LSIL	benign	Negative	Negative	Positive	negative	negative	negative
195	44	divorced	0	0	0	0	No	21	9	1	LSIL	benign	inconclusive	Inconclusive	inconclusive	positive	negative	negative
196	55	divorced	4	4	0	0	Yes	14	11	>10	LSIL	benign	Positive	Negative	Negative	positive	positive	positive
197	64	widow	7	6	1	0	Yes	14	16	1	LSIL	benign	Negative	Negative	Positive	negative	negative	negative
198	34	married	3	0	2	1	No	16	12	4	LSIL	benign	inconclusive	Inconclusive	inconclusive	negative	negative	negative
199	61	married	2	1	1	0	Yes	19	16	2	LSIL	benign	Negative	Negative	Negative	negative	negative	negative
200	63	widow	1	1	0	0	Yes	24	10	1	LSIL	benign	Negative	Negative	Negative	negative	negative	negative
201	66	single woman	1	0	0	1	Yes	38	11	5	LSIL	benign	Negative	Negative	Negative	positive	positive	positive
